# Supplementary material
Source: PubMed Central journal article supplement (PMC3146286)

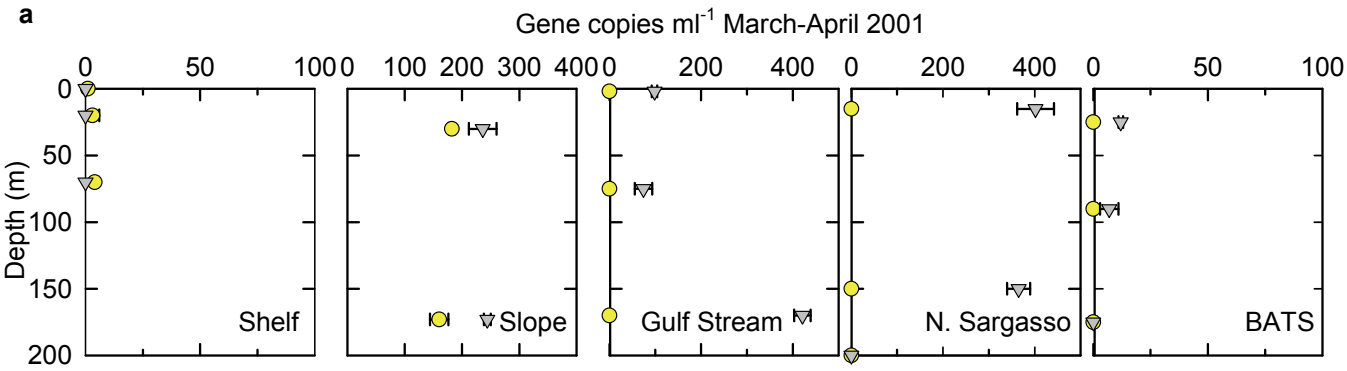

Supplement: ismej2010209x3.pdf [file ismej2010209x3.pdf]

**b**

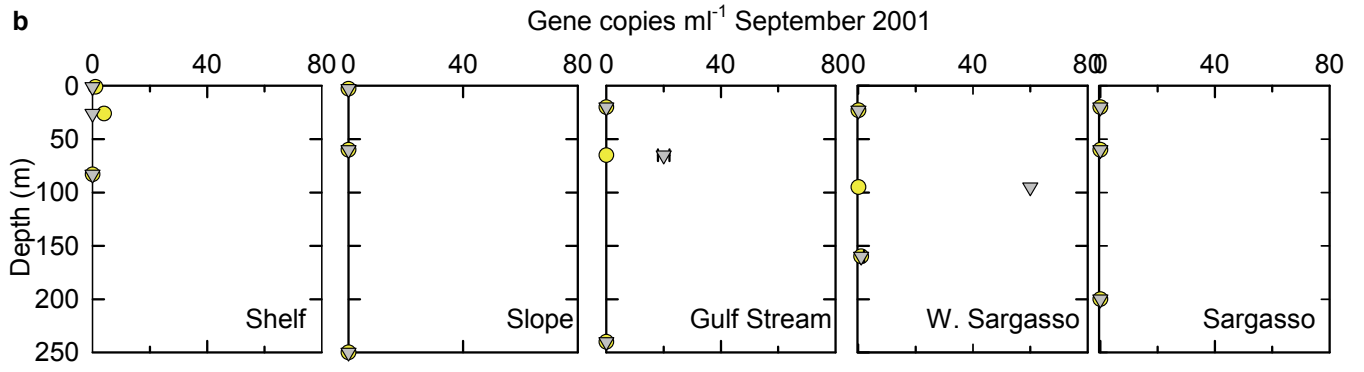

Supplement: ismej2010209x4.pdf [file ismej2010209x4.pdf]

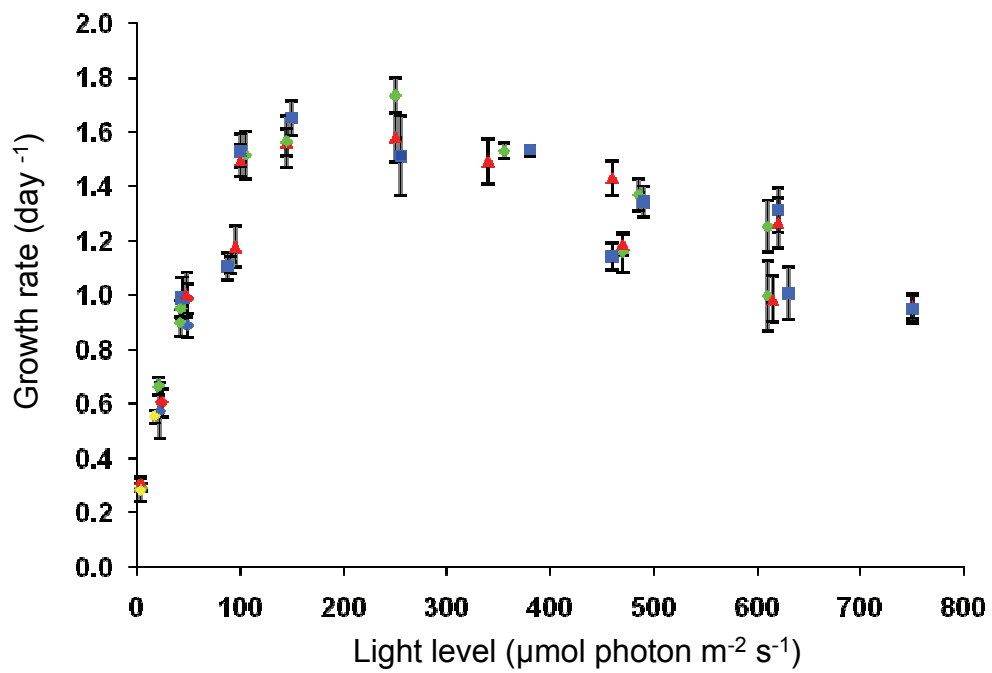

Supplement: ismej2010209x5.pdf [file ismej2010209x5.pdf]
